1 **Title:**

2 Impact of COVID-19 and the postponement of the Tokyo 2020 Paralympic Games on Paralympic athletes  
3 and staff: A cross-sectional study

4  
5 **Authors:**

6 Matthias Walter<sup>1,2,†</sup>, Adam Mesa<sup>2,†</sup>, Laura A. McCracken<sup>2</sup>, Carolyn Barakso<sup>2</sup>, Daniel Bueno Buker<sup>3,4,5</sup>,  
7 Pablo Benavides González<sup>6</sup>, Wanda Holtz<sup>7</sup>, Conchita Jaeger<sup>8</sup>, Tom E. Nightingale<sup>2,9,10,#,\*</sup>, Andrei V.  
8 Krassioukov<sup>2,11,12,#,\*</sup>

9  
10 **Affiliations:**

11 1 Department of Urology, University Hospital Basel, University of Basel, Basel, Switzerland  
12 2 International Collaboration on Repair Discoveries (ICORD), Faculty of Medicine, University of British  
13 Columbia (UBC), Vancouver, British Columbia (BC), Canada  
14 3 - Departamento Medicina Física y Rehabilitación, Hospital Clínico Universidad de Chile, Santiago,  
15 Chile  
16 4 - Facultad de Ciencias, Magíster de Medicina y ciencias del deporte, Universidad Mayor, Santiago,  
17 Chile  
18 5 - Unidad de ejercicio y deporte adaptado, Instituto Teletón, Chile  
19 6 - Faculty of Rehabilitation Sciences, School of Physical Therapy, Universidad Andres Bello, Santiago,  
20 Chile  
21 7 - Universidad Nacional de General San Martín, Buenos Aires, Argentina  
22 8 - Swiss Paralympic Committee, Haus des Sports, Ittigen, Switzerland  
23 9 - School of Sport, Exercise & Rehabilitation Sciences, University of Birmingham, UK  
24 10 - Centre for Trauma Sciences Research, University of Birmingham, Edgbaston, Birmingham, UK  
25 11 - Division of Physical Medicine and Rehabilitation, Faculty of Medicine, The University of British  
26 Columbia, Vancouver, BC, Canada.  
27 12 - GF Strong Rehabilitation Centre, Vancouver Coastal Health, Vancouver, BC, Canada

28  
29  
30 † These authors contributed equally to this work (i.e. shared first authorship).

31 # These authors contributed equally to this work (i.e. shared senior authorship).

32  
33 **\*Correspondence to:**

34 Dr. Matthias Walter ([dr.matze@gmx.de](mailto:dr.matze@gmx.de))

35 Dr. Tom E. Nightingale ([T.E.Nightingale@bham.ac.uk](mailto:T.E.Nightingale@bham.ac.uk))

36  
37 **Keywords (MeSH):**

38 Anxiety, Athletes, COVID-19, Spinal Cord Injuries, Sports, Stress Disorders, Surveys and  
39 Questionnaires

## 40 **Abstract**

41 We aimed to investigate the impact of the postponement of the Tokyo 2020 Paralympic Games on  
42 expected participants' careers, COVID-19 history and mental health using an e-survey. Thirty-nine  
43 participants (median age 37 years; 16 females) from five countries responded between July 20<sup>th</sup> and  
44 September 28<sup>th</sup>, 2021, of which 37 completed the survey, including 20 athletes and 11 coaches. All but  
45 two participants planned to attend the rescheduled Games in 2021 (95%). Ninety percent (35/39) had  
46 previously tested at least once for COVID-19, with six testing positive. While three had no symptoms, all  
47 six were moderately impacted. Scores (median; lower and upper quartiles; questionnaire) for depression  
48 (2; 0.75-4; PHQ-9) and anxiety (2; 0-5.25; GAD-7) were low. Scores for post-traumatic stress disorder  
49 (PTSD) (3.5; 1-11; IES-R) were also low, but four participants reported high scores indicative of clinical  
50 concern for PTSD. There was low emotional distress caused by postponement of the Games (2; 1-4.5),  
51 and moderately low fear of catching COVID-19 (3; 2-5.5) on 10-point (0 = none, 10 = extreme) rating  
52 scales. While overall this population appears relatively resilient, the postponement of the Games came at  
53 a cost for some athletes and coaches, specifically with regards to experiencing symptoms of PTSD.

54

## 55 **Introduction**

56 The postponement of the Tokyo 2020 Paralympic games due to the COVID-19 pandemic was clearly a  
57 necessary safeguard measure to protect the health of athletes, professionals and public who were  
58 scheduled to compete in, work or to be a spectator at the Games. There are, however, potential negative  
59 consequences of this decision on the mental health and athletic or professional careers of these  
60 individuals. The postponement of the Tokyo 2020 Paralympic games is one component of the  
61 multifactorial impact of the COVID-19 pandemic on athletes and professionals, in addition to other  
62 factors such as reduced access to training and fitness centres, fear of infection and anxiety surrounding  
63 ability to recover if infected, and isolation from teams, communities and social support.<sup>1</sup> The negative  
64 consequences of the COVID-19 pandemic and the postponement of the Tokyo 2020 Paralympic games  
65 are likely particularly salient for Paralympic athletes. Individuals with disabilities are disproportionately  
66 affected by government restrictions, more likely to experience worse outcomes from COVID-19,<sup>2,3</sup> and  
67 are at higher risk for mood disorders.<sup>4</sup> There is a need to investigate the effects of the COVID-19  
68 pandemic and related postponement of the Tokyo 2020 Paralympic games on the athletes and  
69 professionals involved. Thus, we aim to investigate the impact of the COVID-19 pandemic and the  
70 postponement of the Tokyo 2020 Paralympic games on associated athletes, coaches, medical  
71 professionals, and members of National Paralympic Committees (NPCs).

72

## 73 **Methods**

### 74 Ethics

75 This study protocol was designed by an international team of clinicians, scientist, and coaches and was  
76 approved by the University of British Columbia Clinical Research Ethics Board (H20-04011).

77

### 78 Study participants

79 A web-based survey was distributed to several NPCs who invited potentially eligible participants.  
80 Inclusion criteria: Athletes, coaches, physicians, medical professionals, and members of NPCs with an  
81 age of at least 18 years, who would have participated in Tokyo 2020 Paralympic Games (had they not  
82 been postponed). Exclusion criteria: those with a history of any cognitive disorders and/or traumatic brain

83 injury that could impact the participants' ability to follow instructions and answer questionnaires, and  
84 those who were not scheduled to participate in or support the Tokyo 2020 Paralympic Games.

85

### 86 Survey

87 This survey included the following five components: 1) demographics, 2) personal COVID-19 history, 3)  
88 participation in Paralympic games (Tokyo 2020 and previous ones), 4) impact of postponement of Tokyo  
89 2020 Paralympic Games on athletic performance or professional career, and 5) validated questionnaires  
90 including the patient health questionnaire (PHQ-9), generalized anxiety disorder assessment (GAD-7),  
91 and the impact of events scale-revised (IES-R). The IES-R, which ask participants about an individual  
92 event, was written to ask specifically of feelings around the postponement of the Tokyo 2020 Paralympic  
93 Games. The survey was offered to participants in five languages: English, French, German, Portuguese  
94 and Spanish. The survey was split into multiple screens based on the aforementioned components and to  
95 facilitate conditionally shown questions. Question and answer order was not randomized. All participants  
96 were provided with an informed consent form and had the opportunity to consent online. Participants  
97 were informed that the survey was expected to take approximately 30-45 minutes to complete, with a  
98 progress tracker at the top and a back button.

99

### 100 Security

101 The survey was hosted on the platform 'Qualtrics', which complies with the BC Freedom of Information  
102 and Protection of Privacy Act (FIPPA) as the survey data is encrypted, kept secure and is stored and in  
103 Canada. This platform is the survey tool endorsed and used by our home institution. The security and  
104 privacy policy for 'Qualtrics' can be found at: [https://it.ubc.ca/services/teaching-learning-tools/survey-  
105 tool/ubc-survey-tool-terms-use](https://it.ubc.ca/services/teaching-learning-tools/survey-tool/ubc-survey-tool-terms-use).

106

### 107 Statistical analysis

108 Demographic information, history of COVID-19, participation in the Paralympic Games and the impact  
109 of the postponement of Tokyo 2020 Paralympic Games on participants' athletic or professional careers  
110 will be presented with descriptive statistics. Data are presented as raw values. Results are presented as  
111 sum or median with 25% and 75% quartiles and range (i.e., min - max). Statistical analyses were  
112 conducted using R statistical software version 4.0.5 for macOS.

113

## 114 **Results**

### 115 Participants

116 A total of 39 participants (16 females [41%]; median age 39 years, 29 – 46, range 18 – 76) responded to  
117 our invitation between July 20<sup>th</sup> and September 28<sup>th</sup>, 2021. Thirty-seven (95%) participants completed the  
118 whole online survey, while one provided answers in part (skipping the validated scales at the end of the  
119 survey). The majority of participants were Paralympic athletes (51%, n = 20). Demographics and  
120 characteristics of participants are highlighted in Table 1. The impact of the Paralympic Games  
121 postponement and respondents' self-reported mental health is highlighted in Figures 1 and 2, with the full  
122 breakdown in Table 2.

123

### 124 COVID-19 infection and its impact on participants

125 Overall, 90% (35/39) of all participants were tested at least once for COVID-19. From that subgroup  
126 (n=35), only 6 (17%) tested positive (5 athletes and one coach from Argentina [=4], Brazil [=1], and

127 Switzerland [=1]). Three participants did not experience any symptoms, two reported a mild illness (i.e.,  
128 fatigue; fast and pounding heartbeat; sleep problems; shortness of breath, muscle/joint pain,  
129 memory/concentration problems, emotional instability), while one stated a moderate illness (i.e., some  
130 evidence of lower respiratory disease during clinical assessment or imaging; fatigue). Of these  
131 participants, the athletes were asked to rate “How much has your COVID-19 infection and post COVID-  
132 19 symptoms impacted the following area of your life?” from 0 - 2 (i.e., negligible impact), 3 - 7 (i.e.,  
133 moderate negative impact) to 8 - 10 (i.e., significant negative impact). With regards to overall quality of  
134 life (n = 4), two reported a negligible impact, one a moderate negative impact, and one a significant  
135 negative impact. Inversely, with regard to their ability to continue training (n = 5), two reported a  
136 negligible impact, one a moderate negative impact, and two a significant negative impact. In addition,  
137 97% (38/39) of all participants were immunized.

138

### 139 Impact on mental health

140 As seen in Table 2, overall scores on the PHQ-9 and GAD-7 were low, with only one and two participants  
141 scoring moderately ( $\geq 10$ , i.e., probable depression or generalized anxiety disorder) on the PHQ-9 and  
142 GAD-7, respectively. Scores were similarly low on the IES-R, but 11% (4/36) scored highly ( $\geq 24$ , i.e.,  
143 clinical concern for PTSD). Further, participants were asked to rate their fear of catching COVID-19 from  
144 0 (no fear) to 10 (extreme fear), with responses being low overall (n = 37; 3; 2 – 5.5), including athletes  
145 (n = 19; 4; 3 – 7), coaches (n = 10; 3; 2 – 4), and all others (n = 8; 2; 1 – 3.5).

146

### 147 Impact of the Tokyo 2020 Paralympic Games’ postponement on career

148 Given that all study participants would have participated in the Tokyo 2020 Paralympic Games had they  
149 happened, 95% (37/39) indicated they were also planning to participate in the 2021 Paralympic Games.  
150 The two participants not planning on participating in the 2021 Paralympic Games were a coach and  
151 medical professional. When asked how much activity levels (for athletes) or professional activities (for all  
152 others) had changed compared to before the pandemic started, 51% (19/37) participants reported slightly  
153 less (n = 15) or considerably less activity (n = 4) than before, while 24% (9/37) reported increases in  
154 activity. Of just athletes, a similar proportion reported slightly less (n = 9) or considerably less activity (n  
155 = 1). Additionally, 35% (13/37) of respondents felt the economic burden of the COVID-19 pandemic had  
156 affected their ability to train or perform professional duties, though there was no statistically significant  
157 correlation with the responses to the question on reduction in activity or work levels. At the time of  
158 survey completion, 81% of respondents (30/37) had resumed normal athletic training or normal  
159 professional activities. Of the seven who had not resumed normal activity, four reported more activity  
160 than before the pandemic, citing training facility closures (for one athlete and an assistant), discomfort in  
161 getting additional exposure to COVID-19 (for one athlete), and other tasks (for one coach). The reasons  
162 given by the other three who had not resumed normal activity levels and were doing less compared to  
163 prior to the pandemic were lockdowns (for one team assistant), “training pauses” (for one athlete), and  
164 loss of hospital resources (for one team physician).

165

### 166 **Discussion**

167 The COVID-19 pandemic has caused global disruption, hardship, and challenges for many regardless of  
168 personal circumstance, and Paralympian athletes, coaches, and associated professionals are no exception.  
169 It has been reported that individuals with disabilities are more disproportionately affected by public health  
170 measures and are more vulnerable to worse outcomes if infected by COVID-19.<sup>1,3</sup> Additionally, as elite

171 athletes, Paralympians must balance strict training regimens, competitions, qualifiers and potentially even  
172 (future) career retirement.<sup>5</sup> The postponement of the Tokyo 2020 Paralympic Games may have had a  
173 further negative impact. That said, no Paralympian works in isolation; there are coaches, team medical  
174 staff, assistants, NPC members, and other support staff who were potentially also disrupted. Thus, we set  
175 out to investigate this impact on participants' athletic or professional career, personal COVID-19 history,  
176 and mental health. Recent studies have focused on athletes in the months immediately surrounding the  
177 postponement of the Olympic and Paralympic Games and what it meant for their mental health,<sup>1,5,6</sup> but  
178 fewer have surveyed athletes around the time of the rescheduled Paralympic Games in 2021, like we did  
179 in this study.

180 While the postponement and the pandemic negatively affected participants, careers ultimately  
181 remained relatively unaffected, as all but two individuals indicated their participation in the rescheduled  
182 2021 Paralympic Games. There may have been uncertainty around this for some in the initial weeks  
183 following the announcement.<sup>5</sup> One recurrent challenge faced by athletes in other studies was the  
184 maintenance of physical activity or professional activities at pre-pandemic levels.<sup>6,7</sup> This was due to early-  
185 pandemic public health measures such as facility closures,<sup>6</sup> although this was less of a factor at the time  
186 of data collection in this report, as seen by a majority of respondents reporting pre-pandemic exercise  
187 levels.

188 Fortunately, the aforementioned public health measures were effective – COVID-19 infection  
189 rates were low among participants. In the few instances that it did occur, infection had a non-negligible  
190 impact on participants' abilities to continue training, even for those who were asymptomatic. This was  
191 likely because of quarantine-minded public health measures (i.e., stay home when sick). However, these  
192 COVID-19-positive participants reported a low impact on their overall quality of life, and illness itself  
193 was mild or asymptomatic in all but one case.

194 Mental health issues reported among participants were also minimal overall, with low levels of  
195 probable depression and generalized anxiety disorder. This is a trend that has been seen in Paralympians  
196 relative to the general able-bodied population in other studies.<sup>8</sup> Surprisingly, a tenth of athletes and  
197 coaches had PTSD-like symptoms towards the postponement of the games. While PTSD-like symptoms  
198 have been previously associated with pandemics<sup>9,10</sup> and are highly prevalent in athletes from any source,<sup>11</sup>  
199 our study data links the postponement of the Tokyo 2020 Paralympic Games to PTSD in only a relatively  
200 minor subsample of participants.

## 201 202 Limitations

203 This was a convenience sample, which could have led to sampling and self-selection bias, with 64% of  
204 respondents coming from South America. However, there was representation from a range of other  
205 countries around the globe. Furthermore, responses were collected retrospectively, with responses  
206 collected over a year after the initial postponement of the Paralympics and at a point where participants  
207 were aware of their participation in the postponed games. Additionally, potential respondents who did  
208 decide not to pursue the rescheduled games may have been less likely to receive and participate in the  
209 online survey. This could partially explain the minimal effects reported in this cohort. Lastly, the study  
210 sample size was small and not all questions required participant responses, which explains the degree of  
211 missing data.

212  
213

214 **Conclusions**

215 Our findings reveal a population of resilient athletes, coaches, and associated professionals whose training  
216 and professional duties were at times disrupted by COVID-19 infection. This was demonstrated by the  
217 high number of participants who planned to or attended the rescheduled Paralympic Games in 2021, low  
218 infection rates and a relatively minor impact on quality of life for those infected with COVID-19.  
219 Participants mental health was predominantly good, with the exception of PTSD-like-symptoms in some  
220 of the cohort. This unexpected finding may prompt future studies and Paralympic organisations to  
221 implement strategies to support athletes and professionals, raise awareness of and minimize PTSD among  
222 their members, including around sporting event schedule changes.

223

224

225 **Acknowledgements**

226 The authors would like to acknowledge all the participants of this study.

227

228 **Funding**

229 This study was not funded.

230

231 **Declaration of author(s)' competing interests**

232 The authors do not report any conflict of interest.

233

234 **Author contributions**

235 All authors contributed to conception, study design, and development of surveys.

236 Authors 1 (MW) and 2 (AM) analysed the data.

237 All authors interpreted the data.

238 Authors 1 (MW) and 2 (AM) drafted the manuscript.

239 Authors 3 (LM), 4 (CB), 5 (DBB), 6 (PBG), 7 (WH), 8 (CJ), 9 (TEN), and 10 (AVK) revised the  
240 manuscript.

241 Authors 1 (MW) and 2 (AM) contributed equally (i.e. shared first author).

242 Authors 9 (TEN), and 10 (AVK) contributed equally (i.e. shared senior author).

243 **References**

244

- 245 1. Mehrsafari AH, Gazerani P, Zadeh AM, Sánchez JCJ. Addressing potential impact of  
246 COVID-19 pandemic on physical and mental health of elite athletes. *Brain Behav Immun.*  
247 2020;87:147. doi:10.1016/j.bbi.2020.05.011
- 248 2. Coronavirus (COVID-19) related deaths by disability status, England and Wales - Office  
249 for National Statistics. Accessed October 31, 2022.  
250 [https://www.ons.gov.uk/peoplepopulationandcommunity/birthsdeathsandmarriages/death](https://www.ons.gov.uk/peoplepopulationandcommunity/birthsdeathsandmarriages/deaths/articles/coronaviruscovid19relateddeathsbydisabilitystatusenglandandwales/2marchto14july2020)  
251 [s/articles/coronaviruscovid19relateddeathsbydisabilitystatusenglandandwales/2marchto14](https://www.ons.gov.uk/peoplepopulationandcommunity/birthsdeathsandmarriages/deaths/articles/coronaviruscovid19relateddeathsbydisabilitystatusenglandandwales/2marchto14july2020)  
252 [july2020](https://www.ons.gov.uk/peoplepopulationandcommunity/birthsdeathsandmarriages/deaths/articles/coronaviruscovid19relateddeathsbydisabilitystatusenglandandwales/2marchto14july2020)
- 253 3. Armitage R, Nellums LB. The COVID-19 response must be disability inclusive. *Lancet*  
254 *Public Health.* 2020;5(5):e257. doi:10.1016/S2468-2667(20)30076-1
- 255 4. North NT. The psychological effects of spinal cord injury: a review. *Spinal Cord.*  
256 1999;37(10):671-679. doi:10.1038/sj.sc.3100913
- 257 5. Bennett EV, Trainor LR, Bundon AM, Tremblay M, Mannella S, Crocker PRE. From  
258 “blessing in disguise” to “what do I do now?”: How Canadian Olympic and Paralympic  
259 hopefuls perceived, experienced, and coped with the postponement of the Tokyo 2020  
260 Games. *Psychol Sport Exerc.* 2022;62:102246. doi:10.1016/j.psychsport.2022.102246
- 261 6. Urbański P, Szeliga Ł, Tasiemski T. Impact of COVID-19 pandemic on athletes with  
262 disabilities preparing for the Paralympic Games in Tokyo. *BMC Res Notes.*  
263 2021;14(1):233. doi:10.1186/s13104-021-05646-0
- 264 7. Washif JA, Farooq A, Krug I, et al. Training During the COVID-19 Lockdown:  
265 Knowledge, Beliefs, and Practices of 12,526 Athletes from 142 Countries and Six  
266 Continents. *Sports Med.* 2022;52(4):933-948. doi:10.1007/s40279-021-01573-z
- 267 8. Busch A, Kubosch EJ, Bendau A, et al. Mental Health in German Paralympic Athletes  
268 During the 1st Year of the COVID-19 Pandemic Compared to a General Population  
269 Sample. *Front Sports Act Living.* 2022;4:870692. doi:10.3389/fspor.2022.870692
- 270 9. Reardon CL, Bindra A, Blauwet C, et al. Mental health management of elite athletes  
271 during COVID-19: a narrative review and recommendations. *Br J Sports Med.*  
272 2021;55(11):608-615. doi:10.1136/bjsports-2020-102884
- 273 10. Delanerolle G, Zeng Y, Shi JQ, et al. Mental health impact of the Middle East respiratory  
274 syndrome, SARS, and COVID-19: A comparative systematic review and meta-analysis.  
275 *World J Psychiatry.* 2022;12(5):739. doi:10.5498/wjp.v12.i5.739
- 276 11. Lynch JH. Posttraumatic Stress Disorder in Elite Athletes. *Curr Sports Med Rep.*  
277 2021;20(12):645-650. doi:10.1249/JSR.0000000000000918

278

279

280

281 **TABLES**

282

283 **Table 1 – Demographics and characteristics of participants**

284

| <b>Characteristics</b>                                                        | <b>n = 39</b> |
|-------------------------------------------------------------------------------|---------------|
| <b>Age in years</b>                                                           |               |
| ≤ 20                                                                          | 4             |
| 21-30                                                                         | 7             |
| 31-40                                                                         | 12            |
| 41-50                                                                         | 7             |
| 51-60                                                                         | 6             |
| 61-70                                                                         | 1             |
| 71-80                                                                         | 2             |
| <b>Sex</b>                                                                    |               |
| Female                                                                        | 16            |
| Male                                                                          | 23            |
| <b>Country representation</b>                                                 |               |
| Argentina                                                                     | 23            |
| Switzerland                                                                   | 10            |
| Canada                                                                        | 3             |
| Chile                                                                         | 1             |
| Brazil                                                                        | 1             |
| Other (not disclosed)                                                         | 1             |
| <b>Participants role regarding the Tokyo 2020 Paralympic games</b>            | <b>n = 39</b> |
| Athlete                                                                       | 20            |
| Coach                                                                         | 11            |
| Member of the national Paralympic committee                                   | 2             |
| Assistant to the team                                                         | 2             |
| Team physician                                                                | 1             |
| Team physical therapist                                                       | 1             |
| Veterinarian                                                                  | 1             |
| Support staff                                                                 | 1             |
| <b>Sport (athletes and coaches only)</b>                                      | <b>n = 31</b> |
| Para athletics                                                                | 12            |
| Wheelchair tennis                                                             | 4             |
| Para table tennis                                                             | 4             |
| Wheelchair rugby                                                              | 3             |
| Para cycling                                                                  | 2             |
| Para shooting sports                                                          | 2             |
| Para badminton                                                                | 1             |
| Para Judo                                                                     | 1             |
| Para rowing                                                                   | 1             |
| Para swimming                                                                 | 1             |
| <b>Previous participation at Paralympic games (athletes and coaches only)</b> | <b>n = 31</b> |
| Yes                                                                           | 16            |
| No                                                                            | 15            |
| <b>Impairment / diagnosis according to IPC (athletes only)</b>                | <b>n = 20</b> |
| Impairment of muscle power                                                    | 10            |
| Hypertonia                                                                    | 3             |
| Limb deficiency                                                               | 2             |
| Leg length deficiency                                                         | 2             |
| Unknown (not disclosed)                                                       | 2             |
| Vision impairment                                                             | 1             |

285

286



287 **Table 2 – Overall impact of COVID-19 on Paralympians**  
288

|                                                           | <b>Median, (quartiles), [range]</b> |
|-----------------------------------------------------------|-------------------------------------|
| <b>Patient Health Questionnaire (PHQ-9)</b>               |                                     |
| Overall (n = 37)                                          | 2.0, (0.0 – 4), [0 – 10]            |
| <i>Athletes (n = 19)</i>                                  | 2.0, (1.0 – 3.5), [0 – 9]           |
| <i>Coaches (n = 10)</i>                                   | 2.0, (0.0 – 3.8), [0 – 5]           |
| <i>All others (n = 8)</i>                                 | 3.5, (0.8 – 5.5), [0 – 10]          |
| <b>General Anxiety Disorder (GAD-7)</b>                   |                                     |
| Overall (n = 37)                                          | 2.0, (0.0 – 5.0), [0 – 14]          |
| <i>Athletes (n = 19)</i>                                  | 3.0, (0.0 – 5.0), [0 – 10]          |
| <i>Coaches (n = 10)</i>                                   | 2.0, (2.0 – 5.2), [0 – 7]           |
| <i>All others (n = 8)</i>                                 | 2.5, (0.0 – 5.5), [0 – 14]          |
| <b>Impact of Event Scale revised (IES-R)</b>              |                                     |
| Overall (n = 36)                                          | 4.0, (1.0 – 11.0), [0 – 32]         |
| <i>Score ≥ 24, i.e. clinical concern for PTSD (n = 4)</i> |                                     |
| <i>Athletes (n = 19), Score ≥ 24 (n = 2)</i>              | 4.0, (1.5 – 12.0), [0 – 30]         |
| <i>Coaches (n = 9), Score ≥ 24 (n = 2)</i>                | 7.0, (3.0 – 8.0), [0 – 32]          |
| <i>All others (n = 8), Score ≥ 24 (n = 0)</i>             | 2.0, (0.8 – 5.0), [0 – 20]          |

289  
290 COVID-19 = Coronavirus disease 2019, PTSD = Post-traumatic stress disorder.

291  
292  
293 **FIGURE LEGENDS**

294  
295 **Figure 1 – Distribution of Patient Health Questionnaire (PHQ-9), General Anxiety Disorder (GAD-**  
296 **7) and Impact of Event Scale revised (IES-R) responses.**

297  
298 Q = question.

## Patient Health Questionnaire (PHQ-9), n = 37

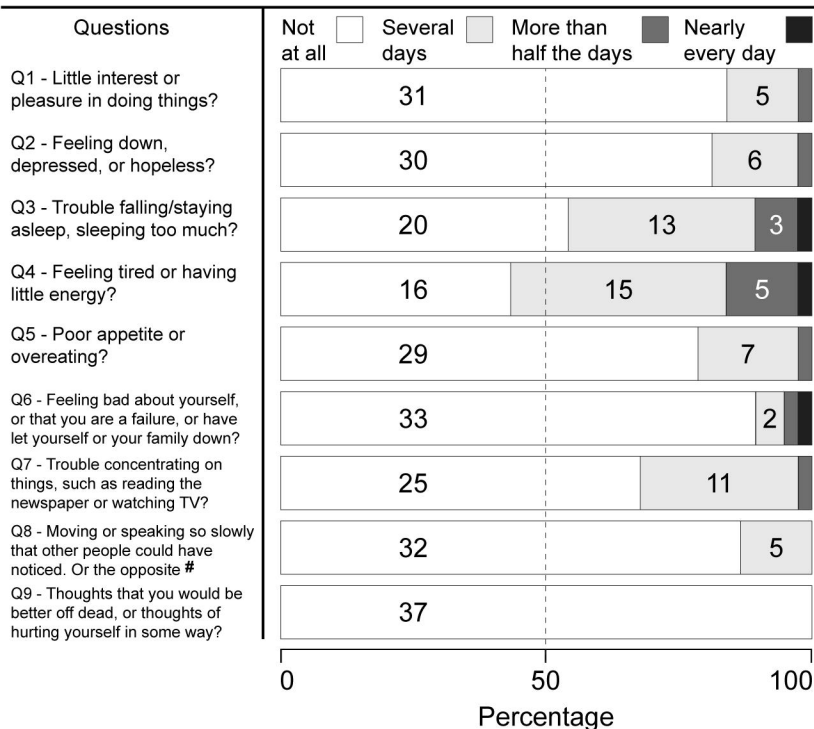

## General Anxiety Disorder (GAD-7), n = 37

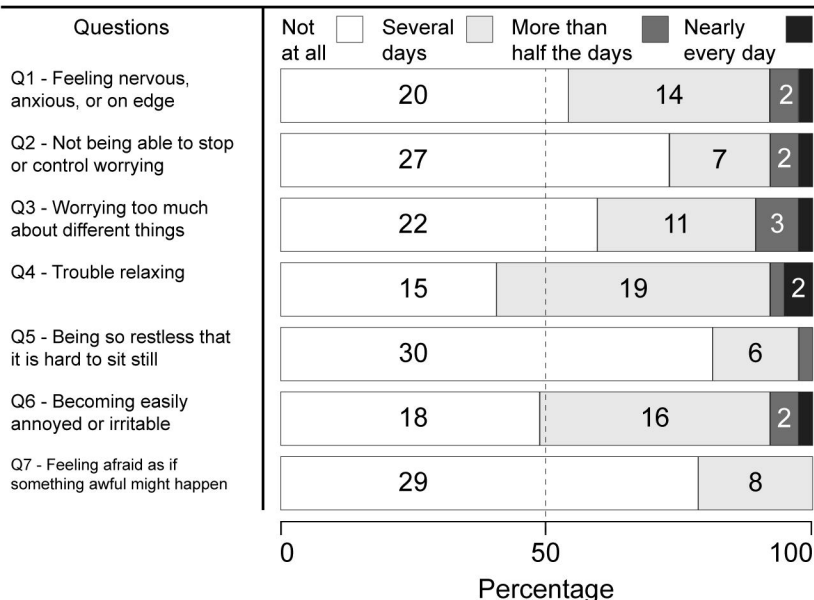

### Extension on questions:

# being so fidgety or restless that you have been moving around more than usual

\* such as sweating, trouble breathing, nausea, or a pounding heart

## Impact of Event Scale revised (IES-R), n = 36

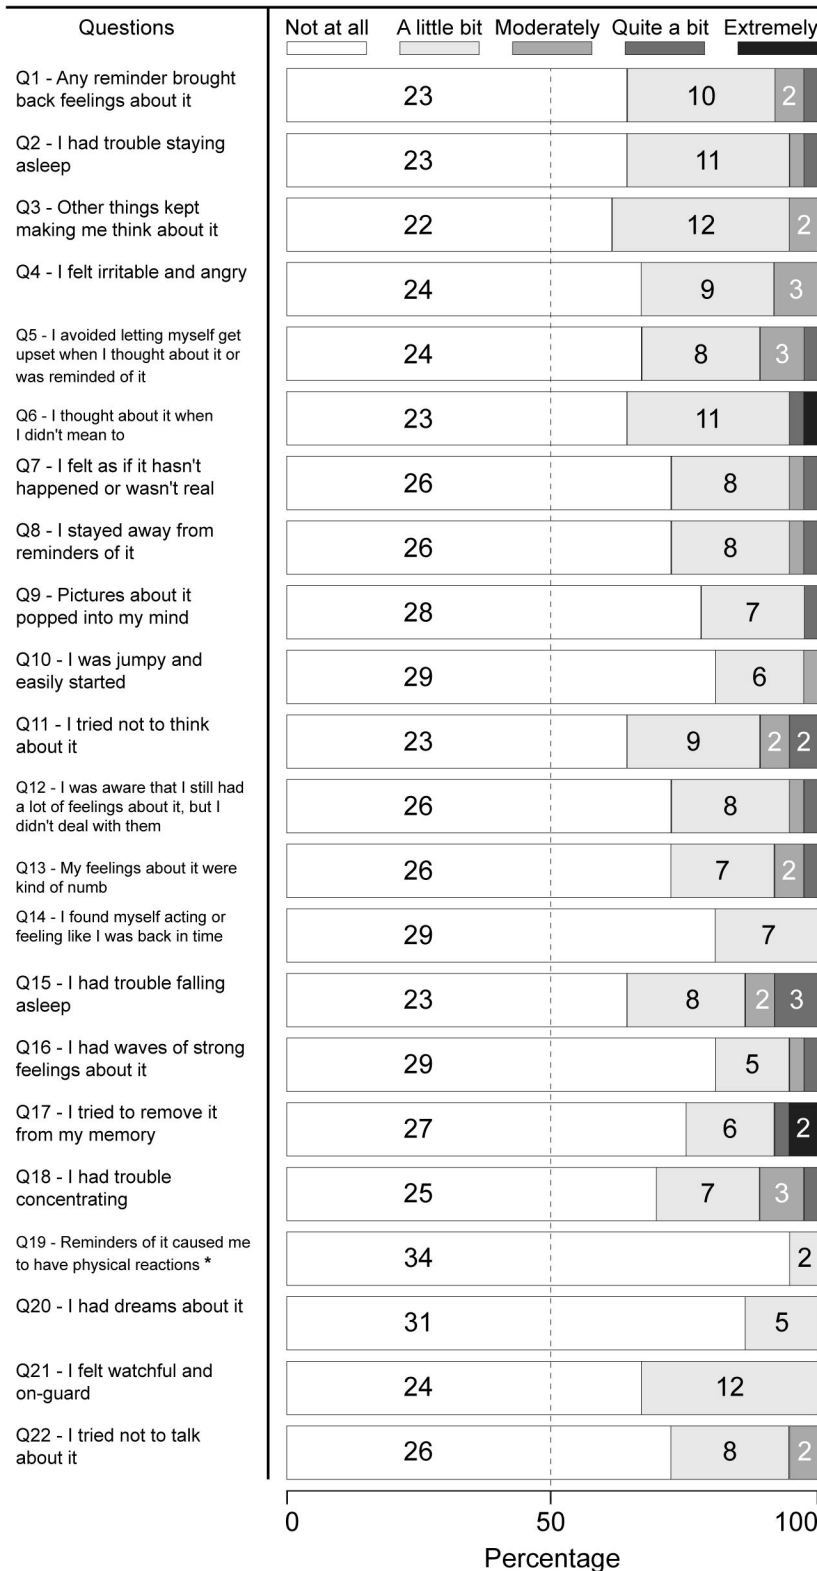

Source: https://www.medrxiv.org/content/medrxiv/early/2022/12/16/2022.12.14.22283406.full.pdf
